# Supplementary material for: Interleukin-37 protects against acinar cell pyroptosis in acute pancreatitis
Source: JCI journal article supplement (doi:10.1172/jci.insight.161244), 2022-09-27
Supplement: sd1 [file 1]

## SUPPLEMENTAL FIGURE LEGENDS

### **Supplemental Figure 1. Bone marrow-derived IL-37 protected mice from experimental**

**AP. (A)** Representative images and quantitative analysis for immunohistochemically labeling of IL-37 in pancreata (n = 4 per group), scale bar= 50  $\mu$ m. **(B)** Schematic diagram of bone marrow transplantation from IL37tg and WT littermates to C57 WT recipients. AP was induced with CAE under SPF conditions for eight weeks (n = 6 per group). **(C)** H&E staining of pancreata at 24 hours. **(D)** Percentages of pancreatic cell death area. Serum amylase and lipase levels at 12 hours. Statistical comparisons were made using student t test or one-way ANOVA. Data are presented as the mean  $\pm$  SD, and statistical significance is denoted as  $^{**}P < 0.01$  and  $^{***}P < 0.001$ .

### **Supplemental Figure 2. The protective effect of IL37 was observed when mice were**

**treated with caerulein at 50  $\mu$ g/kg. (A-B)** WT and IL37tg mice were injected with CAE (50  $\mu$ g/kg, one-hour intervals, 10 times in total), and PBS was injected as control. **(A)** H&E staining of pancreatic tissues. **(B)** Percentages of pancreatic cell death area. Serum amylase, and lipase levels at 12 hours. **(C-D)** WT mice were injected with CAE and treated with rIL37 (5 $\mu$ g/kg, one hour after CAE injection). **(C)** H&E staining of pancreatic tissues. **(D)** Percentages of pancreatic cell death area. Serum amylase, and lipase levels at 12 hours. Statistical comparisons were made using one-way ANOVA. Data are presented as the mean  $\pm$  SD, and statistical significance is denoted as  $^{**}P < 0.01$  and  $^{***}P < 0.001$ .

### **Supplemental Figure 3. IL37 overexpression alleviated AP at 12h. (A)** Timeframe of CAE

**induced AP. (B)** H&E staining of pancreata at 12 hours. **(C)** Percentages of pancreatic cell

death area. Serum amylase and lipase levels at 12 hours. Experiments were repeated three times. Statistical comparisons were made using one-way ANOVA. Data are presented as the mean  $\pm$  SD, and statistical significance is denoted as \*\*\* $P < 0.001$ .

**Supplemental Figure 4 Quantitative analysis for IHC staining of CD68 and MPO in pancreatic tissues.** (A) Quantitative analysis for IHC staining of CD68 and MPO from IL37tg and WT mice that were treated with or without TLCS (n = 4 per group). (B) Quantitative analysis for IHC staining of CD68 and MPO of IL37tg and WT mice that were treated with or without ARG (n = 4 per group). Statistical comparisons were made using one-way ANOVA. Data are presented as the mean  $\pm$  SD, and statistical significance is denoted as \*\*\* $P < 0.001$ .

**Supplemental Figure 5. Administration with rIL37 at different time points protected against AP and this effect could be counteracted by pyroptosis inhibitor.** C57BL/6J WT mice were injected with CAE to induce AP, rIL37 were administrated one, three, and six hours after the first CAE injection (n=6 per group). Moreover, GSDMD inhibitor disulfiram (DSF) were injected at 50 mg/kg. (A) H&E staining of pancreata at 24 hours. (B) Percentages of pancreatic cell death area. Serum amylase and lipase levels at 12 hours. Statistical comparisons were made using one-way ANOVA. Data are presented as the mean  $\pm$  SD, and statistical significance is denoted as \* $P < 0.05$ , \*\* $P < 0.01$ , and \*\*\* $P < 0.001$ . No statistical significance is denoted as *ns*.

**Supplemental Figure 6. Prophylactic administration with rIL37 reduced pancreatitis.** The time dependency of the effect of rIL37 on AP progression, WT mice were randomly divided into PBS, CAE-induced AP model, and AP+rIL37 (5 $\mu$ g/kg, pre-one hour) prevention

groups. (A) H&E staining of pancreata at 24 hours. (B) Percentages of pancreatic cell death area. Serum amylase and IL-1 $\beta$  levels at 12 hours. (n = 5–6 per group). Statistical comparisons were made using one-way ANOVA. Data are presented as the mean  $\pm$  SD, and statistical significance is denoted as \* $P$  < 0.05, \*\* $P$  < 0.01, and \*\*\* $P$  < 0.001.

**Supplemental Figure 7. IL37 rescued AP independent of autophagic or apoptotic pathway.** (A-B) Western blot analyses and qualification of the expression of Beclin1, LC3B (II/I), Bax, and Bcl-2 in pancreatic tissues (n = 3 per group). Experiments were repeated three times. Statistical comparisons were made using one-way ANOVA. Data are presented as the mean  $\pm$ SD, and statistical significance is denoted as \* $P$  < 0.05, \*\* $P$  < 0.01, and \*\*\* $P$  < 0.001.

**Supplemental Figure 8. Western blot analysis of GSDMD expression in *Gsdmd*<sup>fl/fl</sup> and *Pdx1*<sup>cre</sup>*Gsdmd*<sup>fl/fl</sup> mice.** (A) Western blot analyses and qualification of the expression of GSDMD (pro- and cleaved-) in pancreatic tissues from *Gsdmd*<sup>fl/fl</sup> and *Pdx1*<sup>cre</sup>*Gsdmd*<sup>fl/fl</sup> mice treated with or without caerulein (n = 3 per group). Statistical comparisons were made using one-way ANOVA. Data are presented as the mean  $\pm$ SD, and statistical significance is denoted as \* $P$  < 0.05, \*\* $P$  < 0.01, and \*\*\* $P$  < 0.001.

**Supplemental Figure 1**

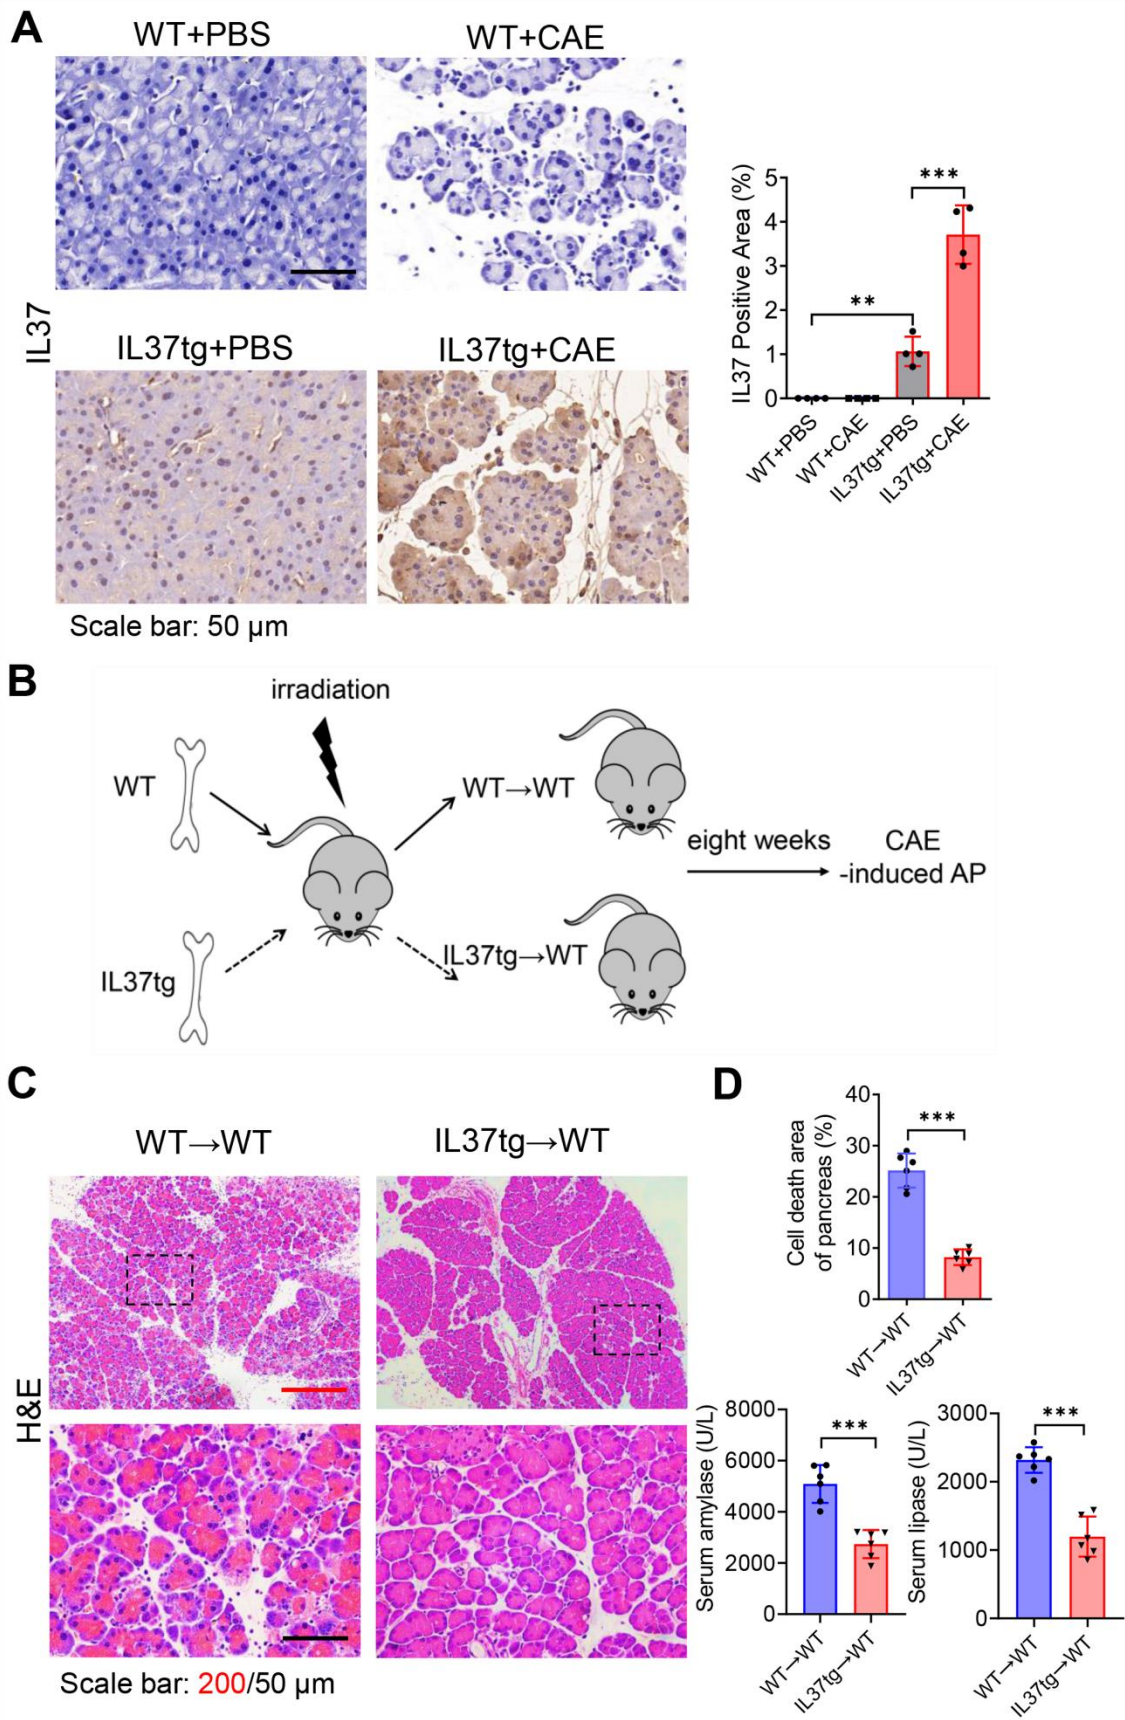

**Supplemental Figure 2**

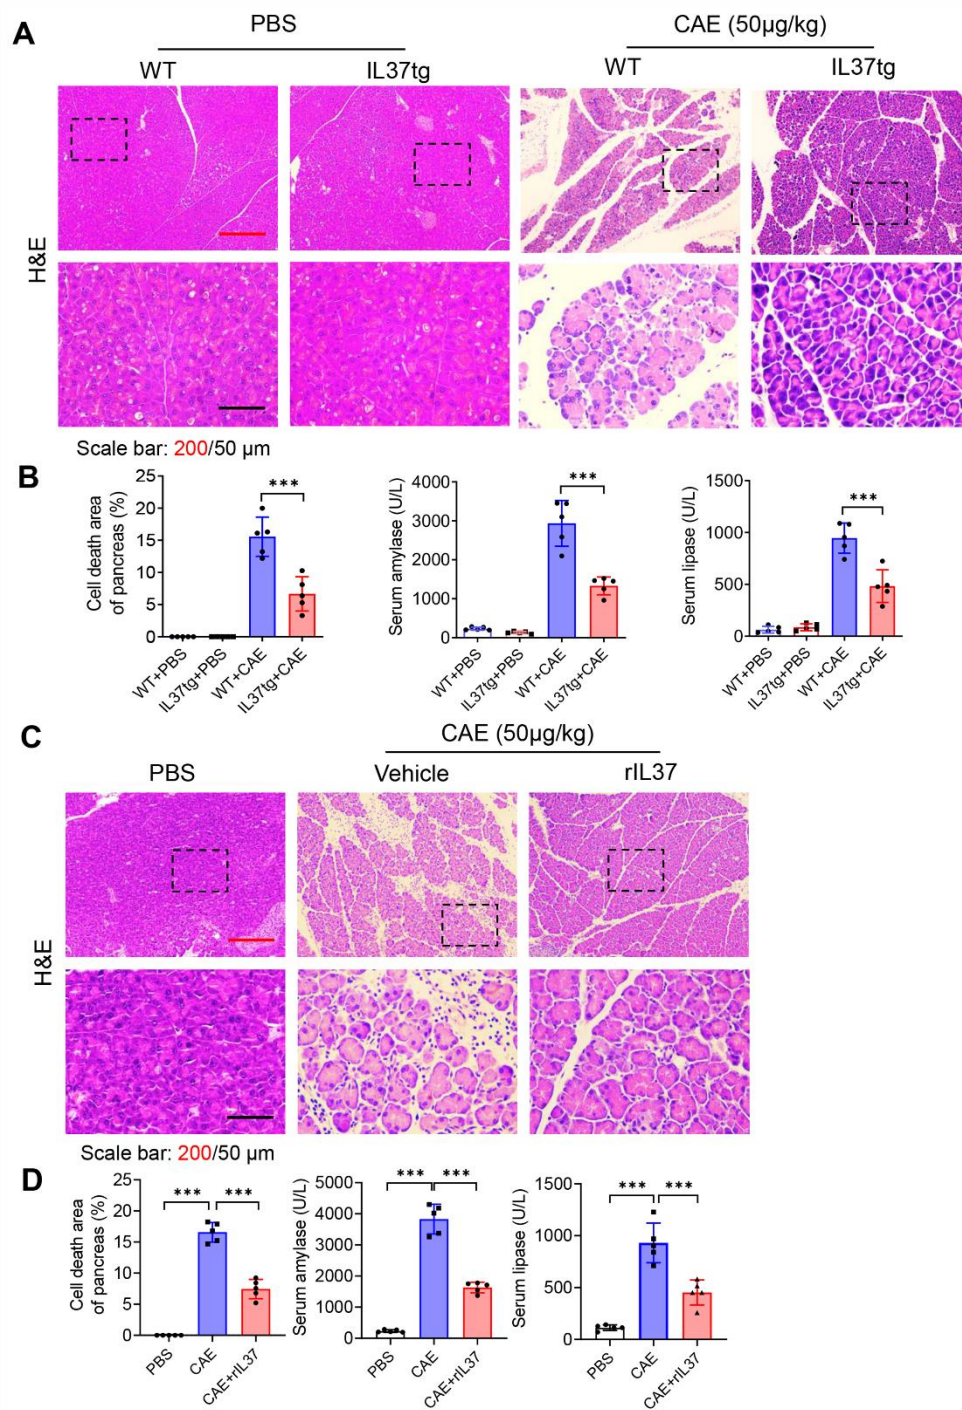



**Supplemental Figure 3**

**A**

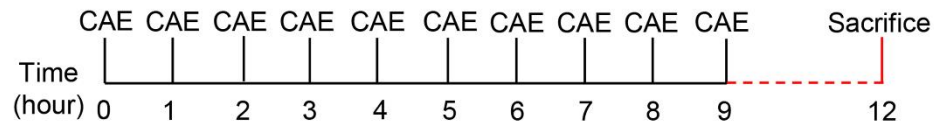

**B**

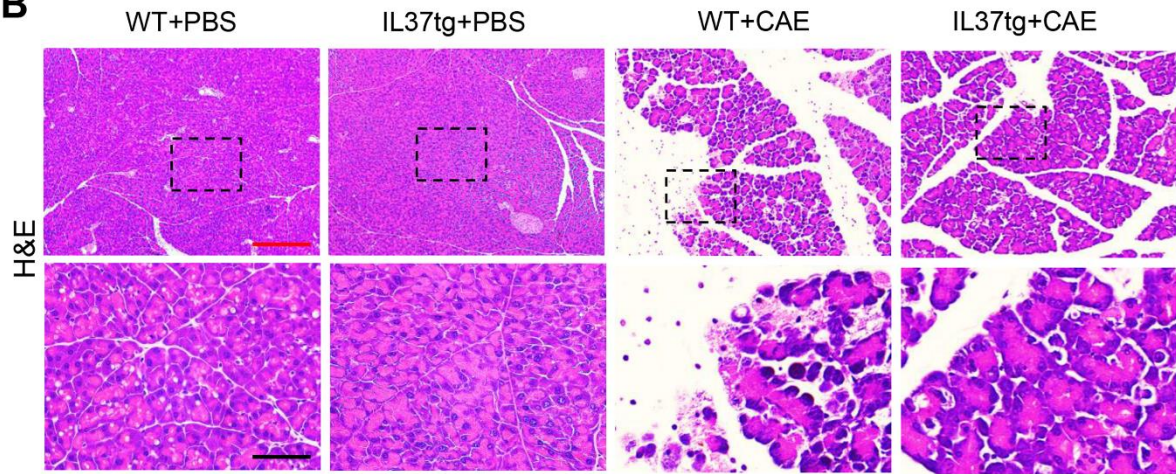

**C**

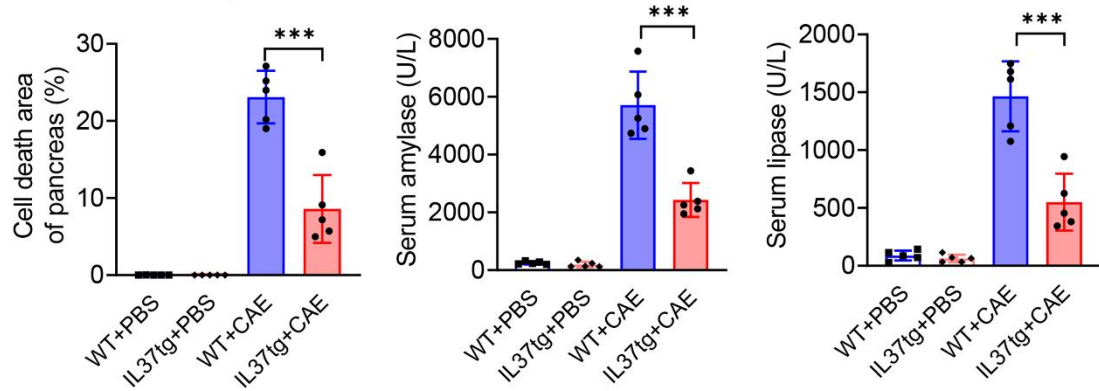

**Supplemental Figure 4**

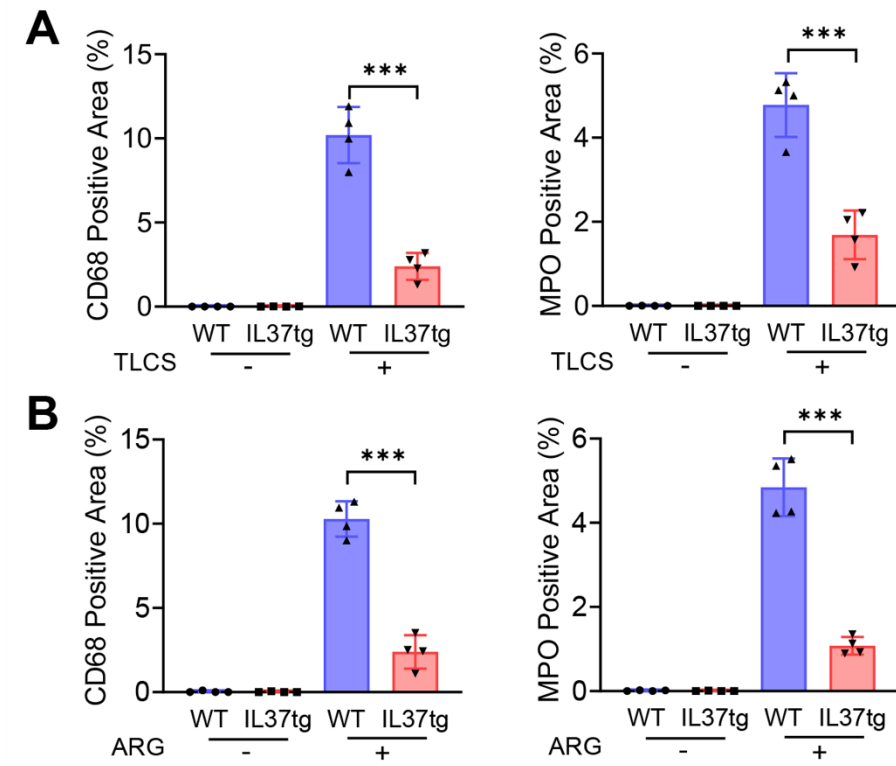

### Supplemental Figure 5

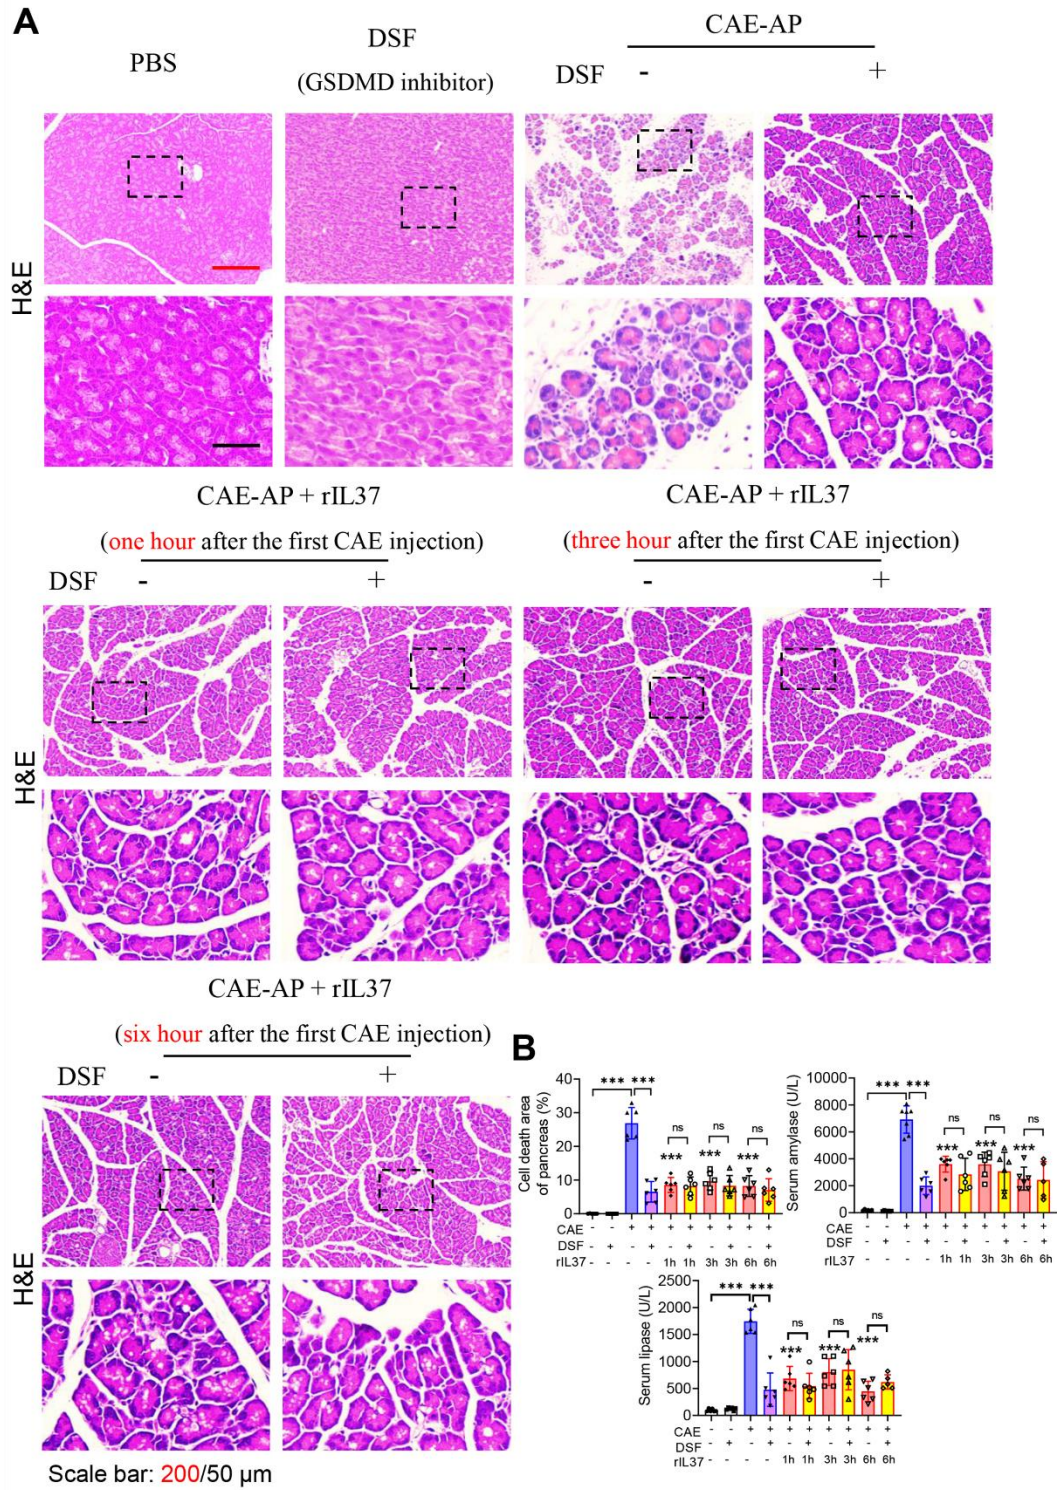



Supplemental Figure 6

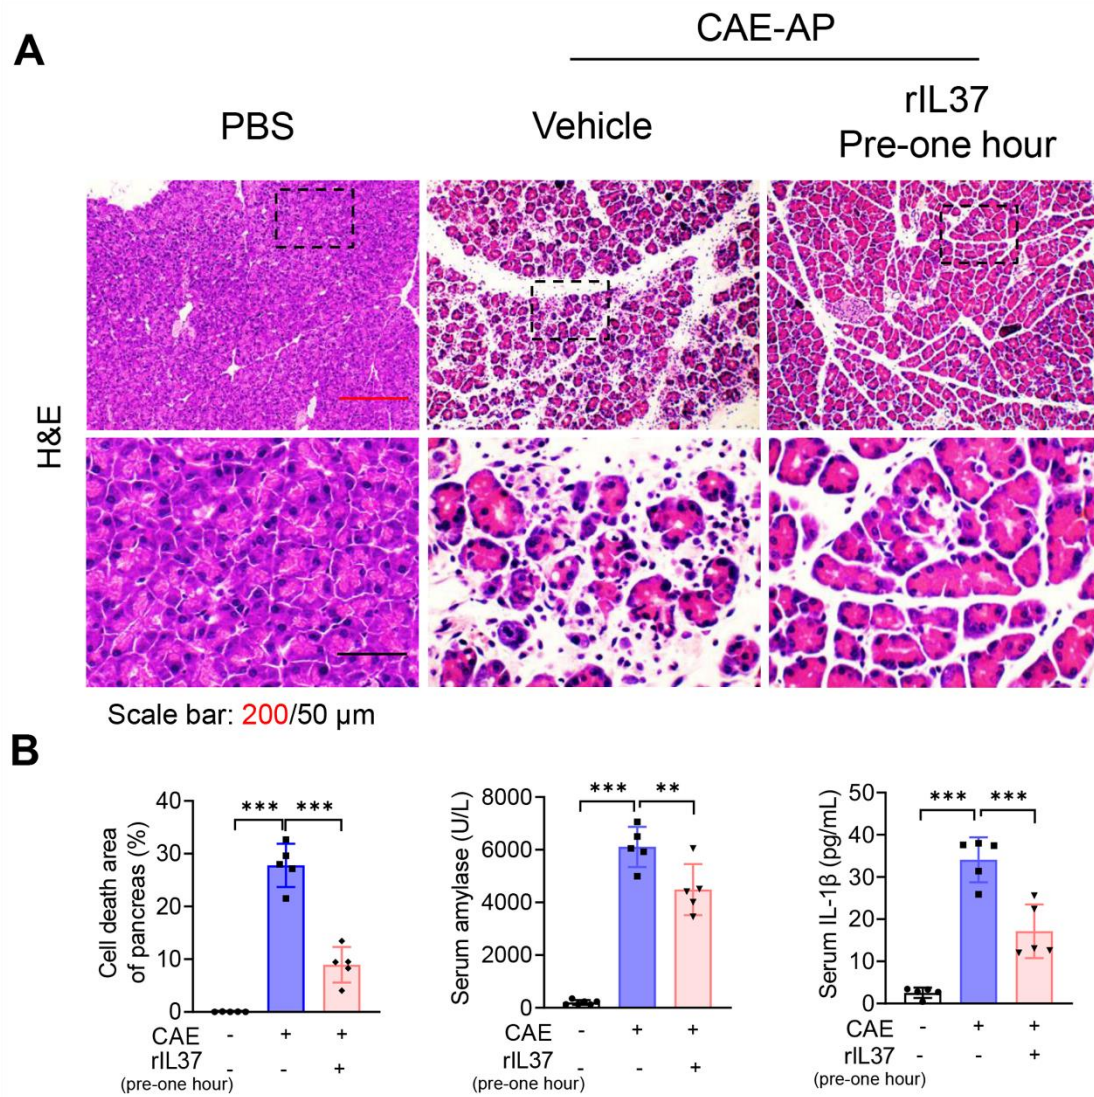

**Supplemental Figure 7**

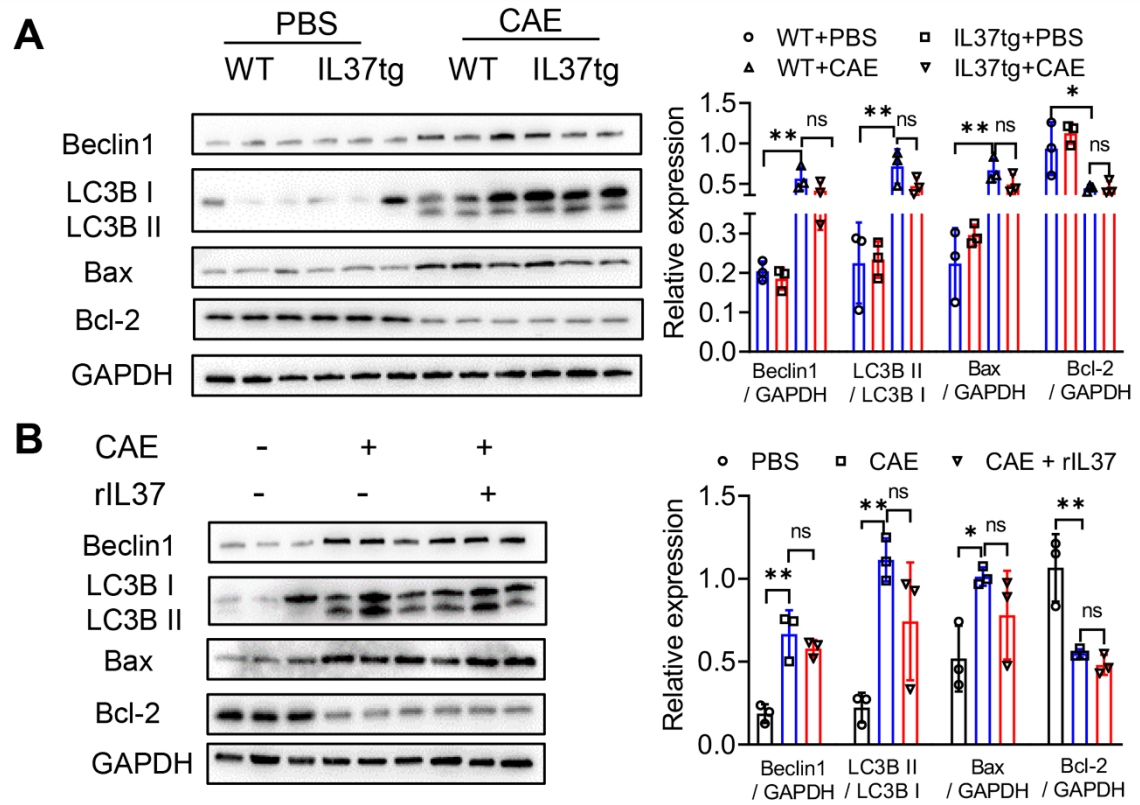

**Supplemental Figure 8**

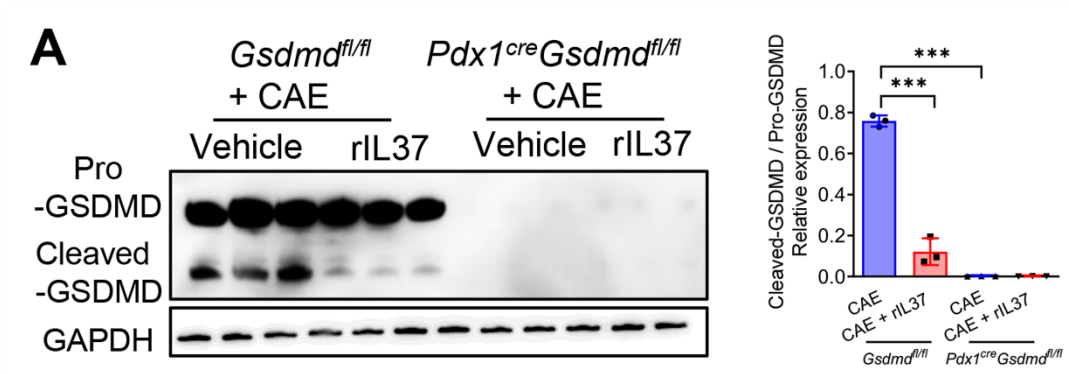

**Supplemental Table 1 Univariate and multivariate analyses of risk factors for pancreatic necrosis in AP patients.**

| Variables                              | Non-PN group         | PN group              | Univariate analysis |                  | Multivariable analysis |                   |
|----------------------------------------|----------------------|-----------------------|---------------------|------------------|------------------------|-------------------|
|                                        | N=34                 | N=60                  | P value             | OR (95% CI)      | P value                | OR (95% CI)       |
| Age, years                             | 42 ± 15              | 42 ± 12               | 0.942               | 1.00 (0.97-1.04) |                        |                   |
| Gender, Male                           | 23 (67.6%)           | 47 (78.3%)            | 0.256               | 0.58 (0.23-1.45) |                        |                   |
| BMI, kg/m <sup>2</sup>                 | 25.49 ± 3.77         | 27.44 ± 3.88          | 0.044               | 1.16 (1.00-1.34) | 0.734                  | 1.04 (0.84-1.27)  |
| Smoking                                | 12 (35.3%)           | 17 (28.3%)            | 0.483               | 0.72 (0.29-1.78) |                        |                   |
| Drinking                               | 8 (23.5%)            | 21 (35.0%)            | 0.250               | 1.75 (0.68-1.56) |                        |                   |
| APACHE II                              | 4.5 (2-7)            | 10 (7-14)             | <0.001              | 1.36 (1.18-1.56) | 0.048                  | 1.2 (1.00- 1.45)  |
| CTSI score                             | 3 (2-4)              | 7 (5.3-8)             | <0.001              | 4.57 (2.34-8.89) |                        |                   |
| <b>Laboratory indexes at admission</b> |                      |                       |                     |                  |                        |                   |
| WBC, ×10 <sup>9</sup> /L               | 9.48 (6.95-11.41)    | 10.52 (8.24-13.18)    | 0.074               | 1.12 (0.99-1.26) | 0.114                  | 1.17 (0.96-1.44)  |
| PLT, ×10 <sup>9</sup> /L               | 167.27 ± 51.54       | 167.98 ± 69.96        | 0.958               | 1.00 (0.99-1.01) |                        |                   |
| HCT, %                                 | 38.40 ± 5.40         | 33.90 ± 7.30          | 0.004               | 0.90(0.83, 0.97) | 0.071                  | 0.90 (0.80-1.01)  |
| Amylase, U/L                           | 123 (61, 255)        | 144 (60, 266)         | 0.257               | 1.00 (0.99-1.00) |                        |                   |
| Lipase, U/L                            | 408 (206, 1017)      | 568 (216, 1098)       | 0.996               | 1.00 (0.99-1.00) |                        |                   |
| LDH, U/L                               | 5.84 (4.27-7.65)     | 17.79 (8.32-27.73)    | 0.002               | 1.1(1.03-1.17)   | 0.927                  | 1.00 (0.96- 1.05) |
| CRP, mg/L                              | 120.30 ± 77.82       | 188.88 ± 69.74        | <0.001              | 1.01 (1.01-1.02) | 0.141                  | 1.00 (0.99-1.02)  |
| IL-6, ng/L                             | 38.84 (15.48-95.26)  | 157.30 (66.14-300.05) | <0.001              | 1.01 (1.01-1.02) | 0.207                  | 1.00 (0.99-1.01)  |
| PCT, µg/L                              | 0.25 (0.09-0.94)     | 1.09 (0.38-2.17)      | 0.171               | 1.06 (0.98-1.16) |                        |                   |
| SCr, µmol/L                            | 53.25 (43.38-68.78)  | 63.60 (52.00-91.18)   | 0.067               | 1.01 (1.00-1.03) | 0.661                  | 1.00 (0.99-1.01)  |
| BUN, mmol/L                            | 4.25 (2.80-7.65)     | 4.70 (3.43-7.33)      | 0.889               | 1.01 (0.90-1.13) |                        |                   |
| IL-37, pg/ml                           | 81.49 (62.53-118.55) | 55.08 (51.42-58.59)   | <0.001              | 0.92 (0.89-0.96) | 0.041                  | 0.96 (0.93-0.99)  |

Data are described as the mean ± SD, median (IQR), or n (%). SD, standard deviation; OR, odds ratio; CI, confidence interval; PN, pancreatic necrosis; BMI, body mass index; APACHE II, Acute Physiology and Chronic Health Evaluation II; CTSI, Computed Tomography Severity Index; CRP, C-reactive protein; PCT, procalcitonin; WBC, white blood cell; PLT, platelets; HCT, hematocrit; LDH, lactate dehydrogenase; SCr, serum creatinine; BUN, blood urea nitrogen.
